# Supplementary material
Source: Springer Nature journal article supplement (https://www.springermedizin.de/resource/supplementary/12887_2012_935_MOESM2_ESM.pdf/9476116)

**A**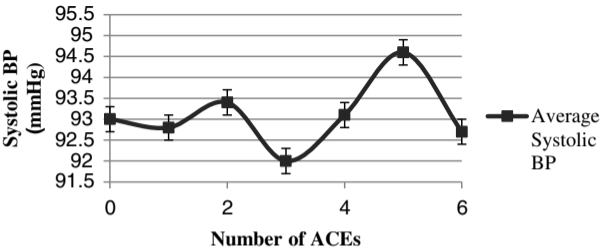**B**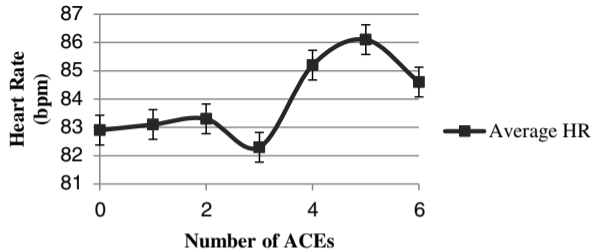**C**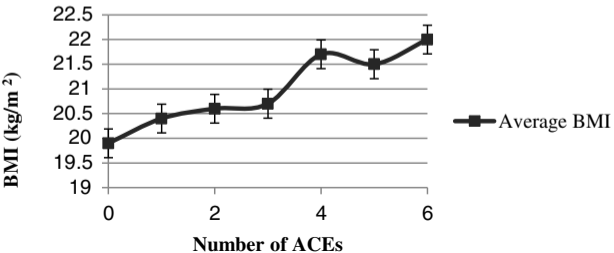**D**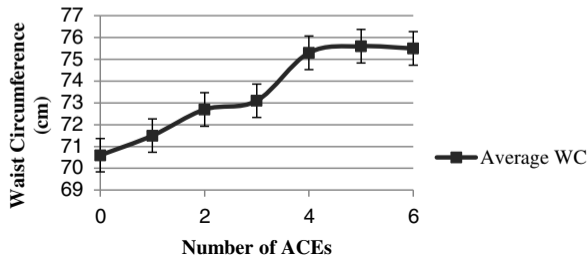

Supplement: MOESM2 [file 9476116]
